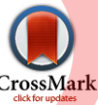

# Eukaryote Culturomics of the Gut Reveals New Species

Nina Gouba, Didier Raoult, Michel Drancourt\*

Aix Marseille Université, URMITE, UMR63, CNRS 7278, IRD 198, Inserm 1095, Marseille, France

## Abstract

The repertoire of microeukaryotes in the human gut has been poorly explored, mainly in individuals living in northern hemisphere countries. We further explored this repertoire using PCR-sequencing and culture in seven individuals living in four tropical countries. A total of 41 microeukaryotes including 38 different fungal species and three protists were detected. Four fungal species, *Davidiella tassiana*, *Davidiella* sp., *Corticiceae* sp., and *Penicillium* sp., were uniquely detected by culture; 27 fungal species were uniquely detected using PCR-sequencing and *Candida albicans*, *Candida glabrata*, *Trichosporon asahii*, *Clavispora lusitaniae*, *Debaryomyces hansenii*, *Malassezia restricta*, and *Malassezia* sp. were detected using both molecular and culture methods. Fourteen microeukaryotes were shared by the seven individuals, whereas 27 species were found in only one individual, including 11 species in Amazonia, nine species in Polynesia, five species in India, and two species in Senegal. These data support a worldwide distribution of *Malassezia* sp., *Trichosporon* sp., and *Candida* sp. in the gut mycobiome. Here, 13 fungal species and two protists, *Stentor roeseli* and *Vorticella campanula*, were observed for first time in the human gut. This study revealed a previously unsuspected diversity in the repertoire of human gut microeukaryotes, suggesting spots for further exploring this repertoire.

**Citation:** Gouba N, Raoult D, Drancourt M (2014) Eukaryote Culturomics of the Gut Reveals New Species. PLoS ONE 9(9): e106994. doi:10.1371/journal.pone.0106994

**Editor:** Kirsten Nielsen, University of Minnesota, United States of America

**Received:** April 14, 2014; **Accepted:** August 7, 2014; **Published:** September 11, 2014

**Copyright:** © 2014 Gouba et al. This is an open-access article distributed under the terms of the Creative Commons Attribution License, which permits unrestricted use, distribution, and reproduction in any medium, provided the original author and source are credited.

**Data Availability:** The authors confirm that all data underlying the findings are fully available without restriction. All relevant data are within the paper.

**Funding:** These authors have no support or funding to report.

**Competing Interests:** The authors have declared that no competing interests exist.

\* Email: michel.drancourt@univ-amu.fr

## Introduction

The human gut microbiota is a diverse ecosystem comprising of bacteria, archaea, virus and eukaryotes referred to as the gut microbiota. It has been observed that the composition of gut microbiota depends on environmental factors [1,2]. Numerous studies focused on gut bacteria, but the repertoire of gut microeukaryotes has been poorly explored [3–8]. Previous studies indicated that components of the gut microbiota, including gut microeukaryotes, were interacting one with each other [9,10]. Recently, high-throughput sequencing and clone library sequencing of gut microeukaryote community indicated that fungi and *Blastocystis* were the two dominant components of gut microeukaryote community [4–6,8,11]. Interestingly, fungal abundance was found to be significantly associated with recently consumed foods: in particular *Candida* spp. abundance significantly correlated with recent consumption of diet rich in high carbohydrates [12]. Likewise, our previous studies on eukaryote community in an obese individual and in an anorexic individual and revealed fungi diversity related to diet [4,13]. A diversity of eukaryotic fungi was detected in healthy individuals and infants with low weight [5,6,8]. Despite evidence for the gut microeukaryote community being influenced by the environment, a few studies have been reported from a limited number of individuals, mainly living in the northern hemisphere countries. Indeed, of twelve studies, three issued from individuals in Europe [4,7,8], three from the USA [6,12,14], two from China [3,15], one from India [16], one from Turkey [17], one from Korea [11] and one from Senegal [5]. Therefore, the current body of knowledge may not be representative of the actual diversity of this repertoire, as no data issued from individuals living

in southern hemisphere countries such as Polynesia and Amazonia. Here, in an effort to broaden knowledge on gut microeukaryotes, we investigated microeukaryotes in seven individuals living in four tropical countries.

## Materials and Methods

### Fecal sample collection

The study was approved by the local ethics committee of the Institut Fédératif de Recherche 48 (IFR 48, Marseille, France; agreement number 09–022). After the participants' written consent was obtained, a stool sample was collected from three individuals from Polynesia (Iles Raietea, rural area), two individuals from Amazonia (Manaus, urban area, forest area), one individual from Senegal (N'Diop, rural area) and one individual in India (New Dheli) (Table 1). No specific pathology was reported in any of these individuals. Each stool sample was preserved as 1-g aliquots in sterile microtubes stored at  $-80^{\circ}\text{C}$  until use.

### DNA-based analyses

Total DNA was extracted using the Qiaamp stool mini kit (Qiagen, Courtaboeuf, France) as previously described using mechanic and enzymatic lyses [4]. Potential PCR inhibitors were tested by mixing *Acanthamoeba castellanii* DNA with DNA extracted from stool specimen prior to PCR, as previously described [4]. A set of 35 eukaryotic PCR primer pairs obtained from the literature were used independently to target the 18S rRNA gene and the internal transcribed spacer (ITS) on all seven specimens as previously described [4]. The PCR reaction (50  $\mu\text{L}$  final volume) contained 5  $\mu\text{L}$  of dNTPs (2 mM of each

**Table 1.** Clone library of microeukaryotes in seven stool samples collected in four different countries. The number of positive clones / total number of clones is given into brackets.

| Location                           | Individual (sex, age) | ITS1F/ITS4R                                                                                                                               | Euk1A/Euk516r                                                                                                                                                                                                                                                                                             | AmiF/AmiR                                                                                                                                          | MAiF/MaLR                                                                                                    |
|------------------------------------|-----------------------|-------------------------------------------------------------------------------------------------------------------------------------------|-----------------------------------------------------------------------------------------------------------------------------------------------------------------------------------------------------------------------------------------------------------------------------------------------------------|----------------------------------------------------------------------------------------------------------------------------------------------------|--------------------------------------------------------------------------------------------------------------|
| Amazonia 1 (Manaus, urban area)    | M, 49                 | <i>Candida albicans</i> (36/48)<br><i>Clavispora lusitanae</i> (12/48)                                                                    |                                                                                                                                                                                                                                                                                                           | <i>Alternaria alternata</i> (2/48)                                                                                                                 | <i>Malassezia</i> sp. (40/48)<br><i>Malassezia restricta</i> (4/48)                                          |
| Amazonia 2 (Amazonian forest area) | M, 39                 | <i>Candida albicans</i> (30/48)<br><i>Trichosporon asahii</i> (12/48)                                                                     | <i>Vorticella campanula</i> (1/48)<br><i>Saccharomyces cerevisiae</i> (2/48)<br><i>Phytophthora pinifolia</i> (1/48)<br><i>Trichosporon asahii</i> (10/48)<br><i>Pleosporales</i> sp.(3/48) <i>Puccinia poarum</i> (1/48) <i>Sclerotinia sclerotiorum</i> (2/48)<br><i>Rhodospiridium babjevae</i> (2/48) | <i>Filobasidium capsuligenum</i> (6/48) <i>Penicillium chrysogenum</i> (2/48)<br><i>Vorticella campanula</i> (1/48) <i>Exophiala equina</i> (1/48) | <i>Malassezia</i> sp. (22/48)<br><i>Malassezia restricta</i> (10/48)<br><i>Malassezia globosa</i> (2/48)     |
| Polynesia 1 (Rural area)           | M, 48                 | <i>Trichosporon asahii</i> (12/48) <i>Candida albicans</i> (30/48) <i>Trichosporon faecale</i> 1/48                                       | <b><i>Westerdykella cylindrica</i> (2/48)</b><br><b><i>Rhodotorula mucilaginosa</i> (2/48)</b><br><i>Blastocystis</i> sp. (1/48)                                                                                                                                                                          |                                                                                                                                                    | <i>Malassezia</i> sp.(22/48)<br><i>Malassezia restricta</i> (6/48)<br><i>Malassezia globosa</i> (2/48)       |
| Polynesia 2 (Rural area)           | M, 32                 | <i>Trichosporon asahii</i> (18/48) <i>Candida albicans</i> (20/48) <i>Galactomyces geotrichum</i> (1/48)                                  | <i>Clitopilus prunulus</i> (1/48)                                                                                                                                                                                                                                                                         |                                                                                                                                                    | <i>Malassezia</i> sp.(20/48)<br><i>Malassezia restricta</i> (12/48)                                          |
| Polynesia 3 (Iles Raiatea)         | M, 49                 | <i>Saccharomycetales</i> sp. (2/48) <i>Clavispora lusitanae</i> (20/48) <i>Fomitopsis pinicola</i> (1/48) <i>Fomes fomentarius</i> (1/48) | <i>Candida glabrata</i> (6/48) <i>Bispora christiansenii</i> (1/48) <i>Yarrowia lipolytica</i> (1/48)                                                                                                                                                                                                     |                                                                                                                                                    |                                                                                                              |
| India (New Delhi)                  | M, 28                 | <i>Candida albicans</i> (12/48) <i>Trichosporon asahii</i> (20/48) <i>Geotrichum candidum</i> (1/48)                                      | <i>Debaryomyces hansenii</i> (5/48)<br><i>Filobasidium globisporum</i> (1/48)<br><i>Candida dubliniensis</i> (1/48) <i>Stentor roeseli</i> (1/48) <i>Rhodotorula mucilaginosa</i> (5/48)<br><i>Westerdykella cylindrica</i> (2/48)                                                                        |                                                                                                                                                    | <i>Malassezia pachydermatis</i> (28/48) <i>Malassezia restricta</i> (10/48) <i>Malassezia globosa</i> (5/48) |
| Senegal (N'Diop)                   | M, 20                 | <i>Galactomyces geotrichum</i> (7/48) <i>Dipodascaceae</i> sp. (2/48) <i>alactomyces candidum</i> (8/48)                                  |                                                                                                                                                                                                                                                                                                           | <i>Saccharomyces cerevisiae</i> (4/48) <i>Aspergillus restrictus</i> (10/48)                                                                       | <i>Malassezia restricta</i> (10/48)<br><i>Malassezia</i> sp.(25/48)                                          |

doi:10.1371/journal.pone.0106994.t001

nucleotide), 5  $\mu$ L of DNA polymerase buffer (Qiagen), 2  $\mu$ L of  $MgCl_2$  (25 mM), 0.25  $\mu$ L HotStarTaq DNA polymerase (1.25 U) (Qiagen), 1  $\mu$ L of each primer (Eurogentec, Seraing, Belgium) and 5  $\mu$ L of DNA. PCR included a 15-min initial denaturation at 95°C followed by 40 cycles including denaturation at 95°C for 30-sec and extension at 72°C for 1 min. A 5-min final extension was performed at 72°C. All PCRs were performed using the 2720 thermal cycler (Applied Biosystems, Saint Aubin, France). PCR buffer without DNA was used as a negative control for each PCR run. PCR products were visualized by electrophoresis using a 1.5% agarose gel. The PCR products were purified using the Nucleo- Fast 96 PCR Kit (Marcherey-Nagel, Hoerd, France) according to the manufacturer's instructions. PCR products were cloned separately using the pGEM -T Easy Vector System Kit as described by the manufacturer (Promega, Lyon, France). Forty-eight white colonies were collected from each PCR product and sequenced using the Big Dye Terminator V1.1 Cycle Sequencing Kit (Applied Biosystems) and M13 primers on ABI PRISM 3130 automated sequencer (Applied Biosystems). Chimeras were eliminated by analyzing sequence with ChromasPro Software. Sequences were compared with sequences available in the GenBank database using BLAST. A 97% sequence similarity and 95% coverage with a described species were used for molecular identification [7]. All the sequences obtained in this

work have been deposited in GenBank database with accession number KF768259-KF768340.

### Culture and identification of fungi

Stool samples were diluted in sterile phosphate-buffered saline (PBS) and cultured on potato dextrose agar (PDA) (Sigma-Aldrich, Saint-Quentin Fallavier, France) from potato infusion and dextrose, Czapeck dox agar (Sigma-Aldrich), semi-synthetic solid medium containing sucrose as C-source and sodium nitrate as the sole source of nitrogen supplemented with 0.05 g/L chloramphenicol and 0.1 g/L gentamycin, Sabouraud dextrose agar (BD diagnostic system) and Dixon agar [18] supplemented with 0.05 mg/mL chloramphenicol and 0.2 mg/mL cycloheximide. Dixon agar medium was prepared as previously described [4]. Following previously published protocols [3,19,20] the agar plates were kept in plastic bags with humid gas to prevent desiccation and incubated aerobically at room temperature (~25°C) in the dark [21]. Dixon agar medium plates were incubated aerobically at 30°C. Growth was observed for two weeks. The dilution solution of the sample was spread on the same media and incubated in the same conditions as a negative control. Fungi were identified with ITS 1F / ITS 4R and MaIF/MaLR. Purified PCR were sequenced using the ITS1R/ ITS4 and MaIF/MaLR primers with the Big Dye Terminator V1,1 Cycle Sequencing Kit (Applied

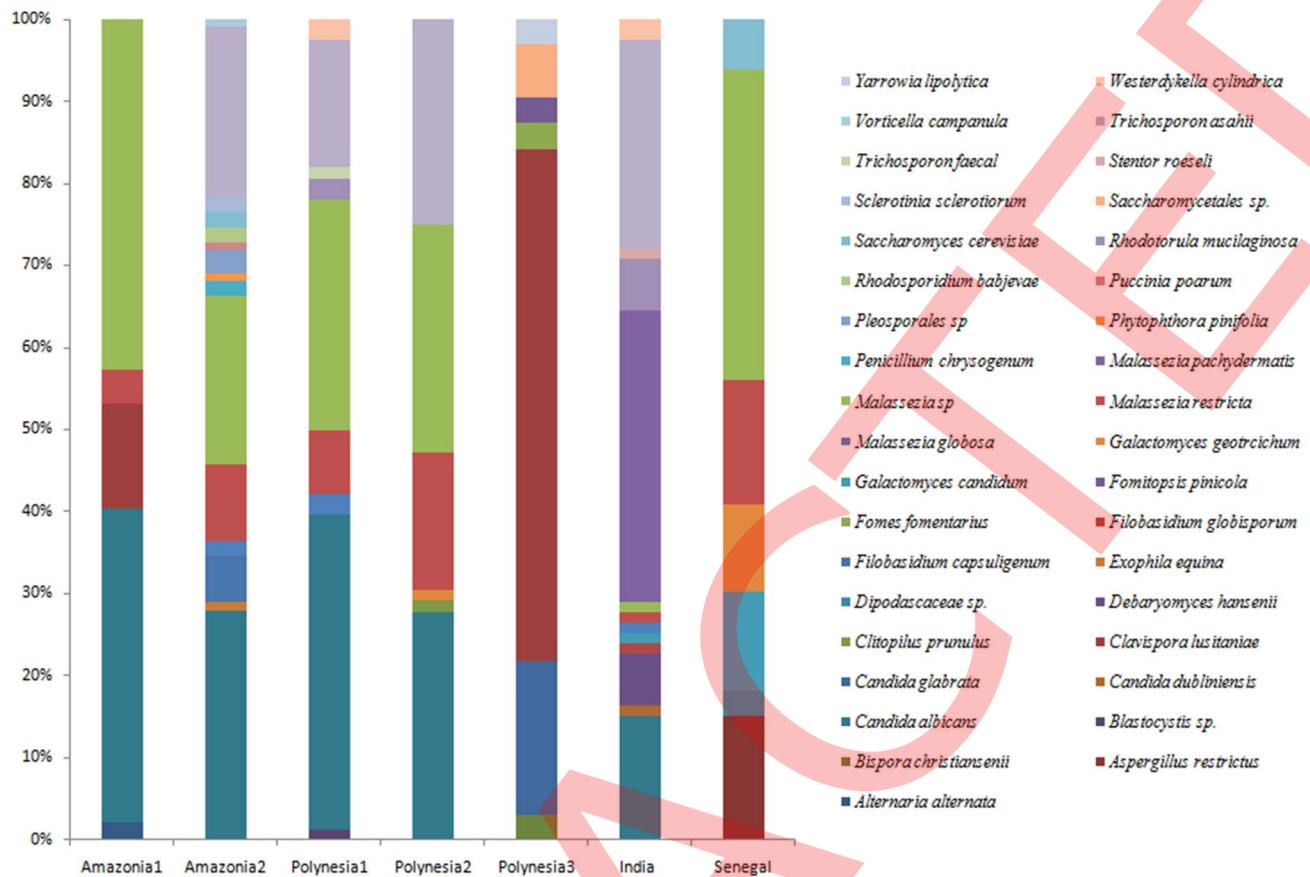

**Figure 1. Microeukaryotes species distributions in seven stool samples from different geographical locations detected by PCR-based methods.**

doi:10.1371/journal.pone.0106994.g001

Biosystems). When the peaks of the sequence overlapped, the amplification products were cloned.

## Results

### Culture-independent methods

In all PCR-based experimental the negative controls remained negative. Among the primers tested, four sets of primers yielded positive amplifications (**Table 1**). *A. castellanii* DNA mixed with stool sample yielded positive amplification. A total of 1,056 clones were sequenced and 528 sequences identified 37 microeukaryotes

including 34 fungal species and three protists *Stentor roeseli*, *Vorticella campanula* and *Blastocystis* sp. (**Table 1**). Plant and human DNA sequences were excluded for analysis. Species distribution in stools from geographical locations is shown in **Figure 1**. *Malassezia* spp. and *Candida* spp. were detected in all stools from different locations except in Polynesia 3 and Senegal, respectively.

### Culture dependant-methods

While the negative control plates remained sterile, stool specimens grew *Candida albicans* (4 positive), *Trichosporon asahii*

**Table 2. Fungal species isolated using four culture media in stool samples collected in four different countries.**

| Location   | Medium                                                                          |                                                                                |                                                 |                                                                                                      |
|------------|---------------------------------------------------------------------------------|--------------------------------------------------------------------------------|-------------------------------------------------|------------------------------------------------------------------------------------------------------|
|            | PDA                                                                             | SDA                                                                            | CZPEK                                           | DA                                                                                                   |
| Amazonia1  | <i>Candida glabrata</i> <i>Candida albicans</i>                                 | <i>Candida glabrata</i> <i>Candida albicans</i>                                | <i>Candida glabrata</i> <i>Candida albicans</i> | <i>Candida albicans</i> <i>Candida glabrata</i> <i>Davidiella tassiiana</i>                          |
| Polynesya1 |                                                                                 | <i>Trichosporon asahii</i> <i>Penicillium</i> sp.                              |                                                 |                                                                                                      |
| Polynesya2 |                                                                                 | <i>Candida albicans</i>                                                        |                                                 | <i>Candida albicans</i> <i>Malassezia restricta</i> <i>Trichosporon asahii</i> <i>Davidiella</i> sp. |
| Polynesya3 | <i>Trichosporon asahii</i> <i>Candida albicans</i>                              | <i>Trichosporon asahii</i> <i>Candida albicans</i>                             |                                                 | <i>Debaryomyces hanseni</i> <i>Trichosporon asahii</i>                                               |
| India      | <i>Candida albicans</i> <i>Trichosporon asahii</i> <i>Clavispora lusitaniae</i> | <i>Trichosporon asahii</i> <i>Clavispora lusitaniae</i> <i>Corticaceae</i> sp. | <i>Penicillium</i> sp.                          | <i>Malassezia restricta</i> <i>Candida albicans</i> <i>Malassezia</i> sp.                            |

doi:10.1371/journal.pone.0106994.t002

**Table 3.** List of microeukaryotes detected by culture and PCR-cloning-sequencing in the gut of seven individuals.

| Individual  | Species                                                                                                                                          |                                                                                                                                                                                                                                                                                                                                 |
|-------------|--------------------------------------------------------------------------------------------------------------------------------------------------|---------------------------------------------------------------------------------------------------------------------------------------------------------------------------------------------------------------------------------------------------------------------------------------------------------------------------------|
|             | Culture                                                                                                                                          | PCR-based                                                                                                                                                                                                                                                                                                                       |
| Amazonia 1  | <i>C. albicans</i> <i>C. glabrata</i> <i>D. tassiana</i>                                                                                         | <i>C. albicans</i> <i>Clavispora lusitaniae</i> <i>Alternaria alternata</i> <i>Malassezia</i> sp. <i>Malassezia restricta</i>                                                                                                                                                                                                   |
| Amazonia 2  |                                                                                                                                                  | <i>C. albicans</i> <i>T. asahii</i> <i>V. campanula</i> <i>S. cerevisiae</i> <i>P. pinifolia</i> <i>Pleospores</i> sp. <i>P. poarum</i> <i>S. sclerotiorum</i> <i>R. babjevae</i> <i>F. capsuligenum</i> <i>P. chrysogenum</i> <i>V. campanula</i> <i>E. equine</i> <i>Malassezia</i> sp. <i>M. restricta</i> <i>M. globosa</i> |
| Polynesia 1 | <i>T. asahii</i> <i>Penicillium</i> sp.                                                                                                          | <i>T. asahii</i> <i>C. albicans</i> <i>T. faecale</i> 1 <i>Malassezia</i> sp. <i>M. restricta</i> <i>M. globosa</i>                                                                                                                                                                                                             |
| Polynesia 2 | <i>C. albicans</i> <i>M. restricta</i> <i>T. asahii</i> <i>Davidiella</i> sp.                                                                    | <i>T. asahii</i> <i>C. albicans</i> <i>G. geotrichum</i> <i>C. prunulus</i> <i>Malassezia</i> sp. <i>M. restricta</i>                                                                                                                                                                                                           |
| Polynesia 3 | <i>D. hansenii</i> <i>C. albicans</i> <i>T. asahii</i>                                                                                           | <i>Saccharomycetales</i> sp. <i>C. lusitaniae</i> <i>F. pinicola</i> <i>F. fomentarius</i> <i>C. glabrata</i> <i>B. christiansenii</i> <i>Y. lipolytica</i>                                                                                                                                                                     |
| India       | <i>T. asahii</i> <i>C. lusitaniae</i> <i>Corticaceae</i> sp. <i>Penicillium</i> sp. <i>M. restricta</i> <i>C. albicans</i> <i>Malassezia</i> sp. | <i>C. albicans</i> <i>T. asahii</i> <i>G. candidum</i> <i>D. hansenii</i> <i>F. globisporum</i> <i>C. dubliniensis</i> <i>S. roeseli</i> <i>R. mucilaginosa</i> <i>W. cylindrica</i> <i>M. pachydermatis</i> <i>M. restricta</i> <i>M. globosa</i>                                                                              |
| Senegal     |                                                                                                                                                  | <i>G. geotrichum</i> <i>Dipodascaceae</i> sp. <i>G. candidum</i> <i>S. cerevisiae</i> <i>A. restrictus</i> <i>M. restricta</i> <i>Malassezia</i> sp.                                                                                                                                                                            |

doi:10.1371/journal.pone.0106994.t003

(4 positive), *Malassezia restricta* (2 positive), and *Candida glabrata*, *Clavispora lusitaniae*, *Debaryomyces hansenii*, *Malassezia* sp., *Corticaceae* sp., *Davidiella tassiana*, *Davidiella* sp., and *Penicillium* sp. each in one specimen. The four later fungal species were detected uniquely by culture-dependant methods (Table 2).

## Overall results

Combining of the two approaches yielded a total of 38 different fungal species and three protists including *S. roeseli*, *V. campanula* and *Blastocystis* sp. Thirteen fungal species and two protists were observed for the first time in the human gut (Table 3). Fourteen fungal species including *C. albicans*, *C. glabrata*, *C. lusitaniae*, *D. hansenii*, *Galactomyces candidum*, *Galactomyces geotrichum*, *Malassezia globosa*, *M. restricta* *Malassezia* sp. *Penicillium* sp., *Rhodotorula mucilaginosa*, *Saccharomyces cerevisiae*, *T. asahii* and *Westerdykella cylindrica* were shared by the seven individuals whereas 27 microeukaryotes were found in only one individual including 11 species in Amazonia, nine species in Polynesia, five species in India and two species in Senegal.

## Discussion

Here, further exploration of gut microeukaryotes in stool specimens collected in seven individuals living in four tropical countries yielded new data about this poorly explored component of the gut microbiota. Fifteen species were observed for the first time in the human gut. *S. roeseli* detected in stool from India and *V. campanula* in stool from Amazonia, are two ciliates previously described from environment in particular in freshwater [22,23]. Moreover, environmental fungi *Puccinia poarum*, *Rhospordium babjevae*, *Phytophthora pinifolia*, *Alternaria alternata*, *Aspergillus restrictus*, *Bispora christiansenii*, *D. tassiana*, *Davidiella* sp. and *W. cylindrica* were previously described as plant pathogen or from fresh water [24–30]. *F. capsuligenum* was previously found in fruit, brewery and in soil [31]. These fungal species have not been previously reported in the human gut.

Some opportunist pathogenic fungi including *C. albicans*, *C. glabrata*, *Filobasidium globisporum*, *T. asahii*, *C. lusitaniae*,

*Rhodotorula mucilaginosa*, *M. restricta*, *M. globosa* and *Yarrowia lipolytica* were previously described in the human gut [3,4,7,15]. *Geotrichum candidum* and *Saccharomyces cerevisiae* were encountered in the human gut and associated with the consumption of cheese and brewery [16,32,33]. Similar study found a correlation between diet and fungi detected in gut [12]. *Exophiala equina* is an environmental fungi previously reported in dialysis water and subcutaneous abscesses [34,35].

Previous studies on eukaryotes diversity in people from Korea, the United Kingdom and Senegal detected some fungal species different from our study and this could be related of individuals location or diet. Here, the high diversity of microeukaryotes observed in Amazonia, India and Africa could be related to individual environment. Similar study on gut bacteria microbiota found the bacteria to be related to host environment and diet [1,2,36]. Our findings are in the same line with previous observation that found that fungal species and protists are dominant components of gut microeukaryotes [8].

## Conclusions

A diversity of 41 microeukaryotes species including 38 fungal species and three protist was detected in stool samples collected from four different tropical locations. A total of 13 fungal species and two protists *Stentor roeseli* and *Vorticella campanula* were observed in the human gut for the first time. Indeed, these microeukaryotes have not been detected among the 249 fungi and the 36 protists cultured and detected from the human gut so far. These data plea for more extensive studies being performed in specimens collected from various geographical regions to further establish the human gut microeukaryote repertoire.

## Author Contributions

Conceived and designed the experiments: MD. Performed the experiments: NG. Analyzed the data: NG MD DR. Contributed reagents/materials/analysis tools: DR. Contributed to the writing of the manuscript: NG MD DR.

## References

- De Filippo C, Cavalieri D, Di PM, Ramazzotti M, Poullet JB, et al. (2010) Impact of diet in shaping gut microbiota revealed by a comparative study in children from Europe and rural Africa. *Proc Natl Acad Sci U S A* 107: 14691–14696.
- Yatsunenko T, Rey FE, Manary MJ, Trehan I, Dominguez-Bello MG, et al. (2012) Human gut microbiome viewed across age and geography. *Nature* 486: 222–227.
- Chen Y, Chen Z, Guo R, Chen N, Lu H, et al. (2011) Correlation between gastrointestinal fungi and varying degrees of chronic hepatitis B virus infection. *Diagn Microbiol Infect Dis* 70: 492–498.
- Gouba N, Raoult D, Drancourt M (2013) Plant and fungal diversity in gut microbiota as revealed by molecular and culture investigations. *PLoS One* 8: e59474.
- Hamad I, Sokhna C, Raoult D, Bittar F (2012) Molecular detection of eukaryotes in a single human stool sample from Senegal. *PLoS One* 7: e40888.
- LaTuga MS, Ellis JC, Cotton CM, Goldberg RN, Wynn JL, et al. (2011) Beyond bacteria: a study of the enteric microbial consortium in extremely low birth weight infants. *PLoS One* 6: e27858.
- Ott SJ, Kuhbacher T, Musfeldt M, Rosenstiel P, Hellmig S, et al. (2008) Fungi and inflammatory bowel diseases: Alterations of composition and diversity. *Scand J Gastroenterol* 43: 831–841.
- Scanlan PD, Marchesi JR (2008) Micro-eukaryotic diversity of the human distal gut microbiota: qualitative assessment using culture-dependent and -independent analysis of faeces. *ISME J* 2: 1183–1193.
- Clemente JC, Ursell LK, Parfrey LW, Knight R (2012) The impact of the gut microbiota on human health: an integrative view. *Cell* 148: 1258–1270.
- Erb Downward JR, Falkowski NR, Mason KL, Muraglia R, Huffnagle GB (2013) Modulation of post-antibiotic bacterial community reassembly and host response by *Candida albicans*. *Sci Rep* 3: 2191.
- Nam YD, Chang HW, Kim KH, Roh SW, Kim MS, et al. (2008) Bacterial, archaeal, and eukaryal diversity in the intestines of Korean people. *J Microbiol* 46: 491–501.
- Hoffmann C, Dollive S, Grunberg S, Chen J, Li H, et al. (2013) Archaea and fungi of the human gut microbiome: correlations with diet and bacterial residents. *PLoS One* 8: e66019.
- Gouba N, Raoult D, Drancourt M (2014) Gut microeukaryotes during anorexia nervosa: a case report. *BMC Res Notes* 7: 33.
- Khatib R, Riederer KM, Ramanathan J, Baran JJr (2001) Faecal fungal flora in healthy volunteers and inpatients. *Mycoses* 44: 151–156.
- Li Q, Wang C, Zhang Q, Tang C, Li N, et al. (2012) Use of 18S ribosomal DNA polymerase chain reaction-denaturing gradient gel electrophoresis to study composition of fungal community in 2 patients with intestinal transplants. *Hum Pathol* 43: 1273–1281.
- Pandey PK, Siddharth J, Verma P, Bavdekar A, Patole MS, et al. (2012) Molecular typing of fecal eukaryotic microbiota of human infants and their respective mothers. *J Biosci* 37: 221–226.
- Agirbasli H, Ozcan SA, Gedikoglu G (2005) Fecal fungal flora of pediatric healthy volunteers and immunosuppressed patients. *Mycopathologia* 159: 515–520.
- Leeming JP, Notman FH (1987) Improved methods for isolation and enumeration of *Malassezia furfur* from human skin. *J Clin Microbiol* 25: 2017–2019.
- Classen AT, Boyle SI, Haskins KE, Overby ST, Hart SC (2003) Community-level physiological profiles of bacteria and fungi: plate type and incubation temperature influences on contrasting soils. *FEMS Microbiol Ecol* 44: 319–328.
- Pereira E, Santos A, Reis F, Tavares RM, Baptista P, et al. (2013) A new effective assay to detect antimicrobial activity of filamentous fungi. *Microbiol Res* 168: 1–5.
- Röhrig J, Kastner C, Fischer R (2013) Light inhibits spore germination through phytochrome in *Aspergillus nidulans*. *Curr Genet* 59: 55–62.
- Foissner W, Blake N, Wolf K, Breiner HW, Stoeck T (2010) Morphological and Molecular Characterization of Some Peritrichs (Ciliophora: Peritrichida) from Tank Bromeliads, Including Two New Genera: *Orborhabdostyla* and *Vorticellides*. *Acta Protozool* 48: 291–319.
- Gong YC, Yu YH, Zhu FY, Feng WS (2007) Molecular phylogeny of Stentor (Ciliophora: Heterotrichea) based on small subunit ribosomal RNA sequences. *J Eukaryot Microbiol* 54: 45–48.
- Bhattacharya K, Raha S (2002) Deteriorative changes of maize, groundnut and soybean seeds by fungi in storage. *Mycopathologia* 155: 135–141.
- Duran A, Slippers B, Gryzenhout M, Ahumada R, Drenth A, et al. (2009) DNA-based method for rapid identification of the pine pathogen, *Phytophthora pinifolia*. *FEMS Microbiol Lett* 298: 99–104.
- Goncalves VN, Vaz AB, Rosa CA, Rosa LH (2012) Diversity and distribution of fungal communities in lakes of Antarctica. *FEMS Microbiol Ecol* 82: 459–471.
- McCormick MA, Grand LF, Post JB, Cubeta MA (2013) Phylogenetic and phenotypic characterization of *Fomes fasciatus* and *Fomes fomentarius* in the United States. *Mycologia* 105: 1524–1534.
- Al-Khesraji TO, Lösel DM (1980) Intracellular structures of *Puccinia Poarum* on its alternate hosts. *T Brit Mycol Soc* 75: 397–411.
- Takahashi T (1997) Airborne fungal colony-forming units in outdoor and indoor environments in Yokohama, Japan. *Mycopathologia* 139: 23–33.
- Vallini G, Frassinetti S, Scorzettì G (1997) *Candida aquatextoris* sp. nov., a new species of yeast occurring in sludge from a textile industry wastewater treatment plant in Tuscany, Italy. *Int J Syst Bacteriol* 47: 336–340.
- Keszthelyi A, Hamari Z, Pfeiffer I, Vágvölgyi C, Kucsera J (2008) Comparison of killer toxin-producing and non-producing strains of *Filobasidium capsuligenum*: Proposal for two varieties. *Microbiol Res* 163: 167–276.
- Firmesse O, Alvaro E, Mogenet A, Bresson JL, Lemeze R, et al. (2008) Fate and effects of Camembert cheese micro-organisms in the human colonic microbiota of healthy volunteers after regular Camembert consumption. *Int J Food Microbiol* 125: 176–181.
- Kitagaki H, Kitamoto K (2013) Breeding research on sake yeasts in Japan: history, recent technological advances, and future perspectives. *Annu Rev Food Sci Technol* 4: 215–235.
- Figel IC, Marangoni PR, Tralamazza SM, Vicente VA, Dalzoto PR, et al. (2013) Black yeasts-like fungi isolated from dialysis water in hemodialysis units. *Mycopathologia* 175: 413–420.
- Najafzadeh MJ, Suh MK, Lee MH, Ha GY, Kim JR, et al. (2013) Subcutaneous phaeohyphomycosis caused by *Exophiala equina*, with susceptibility to eight antifungal drugs. *J Med Microbiol* 62: 797–800.
- Smith MI, Yatsunenko T, Manary MJ, Trehan I, Mkakosya R, et al. (2013) Gut microbiomes of Malawian twin pairs discordant for kwashiorkor. *Science* 339: 548–554.
